# Supplementary material for: Optimal Decision Rules for Biomarker-Based Subgroup Selection for a Targeted Therapy in Oncology
Source: MDPI journal article supplement (doi:10.3390/ijms160510354), 2015-05-07
Supplement: s1 [file s1]

(\* Mathematica Code for determination of optimal decision thresholds

|            |                                                                                                                                    |
|------------|------------------------------------------------------------------------------------------------------------------------------------|
| [aC1,bC1]: | prior interval for event rates in G_1 in the control group                                                                         |
| [aC2,bC2]: | prior interval for event rates in G_2 in the control group                                                                         |
| [aT1,bT1]: | prior interval for event rates in G_1 in the treatment group                                                                       |
| [aT2,bT2]: | prior interval for event rates in G_2 in the treatment group                                                                       |
| n:         | number of patients per group and stage                                                                                             |
| prev:      | prevalence of G_1                                                                                                                  |
| tau0:      | relevance threshold for G_0                                                                                                        |
| tau1:      | relevance threshold for G_1                                                                                                        |
| c0:        | decision threshold for G_0 to be optimized                                                                                         |
| c1:        | decision threshold for G_1 to be optimized                                                                                         |
| g0[]:      | derivative of the expected loss given G_0 is wrongly selected                                                                      |
| h0[]:      | derivative of the expected loss given G_0 is wrongly not selected                                                                  |
| g1[]:      | derivative of the expected loss given G_1 is wrongly selected                                                                      |
| h1[]:      | derivative of the expected loss given G_1 is wrongly not selected                                                                  |
| f0[]:      | derivative of the expected loss given a false decision concerning G_0 occurred                                                     |
| f1[]:      | derivative of the expected loss given a false decision concerning G_1 occurred                                                     |
| b[]:       | function that rounds the results on four digits and maps values smaller than - 1 to -1 and values larger than 1 to 1, respectively |
| opt0[]:    | yields the root of f0, i.e. the optimal threshold c0*                                                                              |
| opt1[]:    | yields the root of f1, i.e. the optimal threshold c1*                                                                              |
| opt[]:     | yields [c0*,c1*]                                                                                                                   |

Local adaptive method was applied for numerical integration with precision of 8 digits.

Secant method was applied for numerical root solving with precision of 3 digits.\*)

```

g0[aC1_?NumericQ, bC1_?NumericQ, aC2_?NumericQ, bC2_?NumericQ,
  aT1_?NumericQ, bT1_?NumericQ, aT2_?NumericQ, bT2_?NumericQ,
  tau0_?NumericQ, n_?NumericQ, prev_?NumericQ, c0_?NumericQ] :=
NIntegrate[-((prev*(pT1-pC1)+(1-prev)*(pT2-pC2)-tau0))^(2)*
  Boole[((prev*(pT1-pC1)+(1-prev)*(pT2-pC2)))<tau0]*Exp[-(c0-
  (prev*(pT1-pC1)+(1-prev)*(pT2-pC2)))^2/
  (2*((prev*(pT1*(1-pT1)+pC1*(1-pC1)))+(
  (1-prev)*(pT2*(1-pT2)+pC2*(1-pC2)))/n)],
  {pT1, aT1, bT1}, {pC1, aC1, bC1}, {pT2, aT2, bT2}, {pC2, aC2, bC2},
  Method->"LocalAdaptive",
  PrecisionGoal->8]

h0[aC1_?NumericQ, bC1_?NumericQ, aC2_?NumericQ, bC2_?NumericQ,
  aT1_?NumericQ, bT1_?NumericQ, aT2_?NumericQ, bT2_?NumericQ,
  tau0_?NumericQ, n_?NumericQ, prev_?NumericQ, c0_?NumericQ] :=
NIntegrate[+((prev*(pT1-pC1)+(1-prev)*(pT2-pC2)-tau0))^(2)*
  Boole[((prev*(pT1-pC1)+(1-prev)*(pT2-pC2)))>tau0]*Exp[-(c0-
  (prev*(pT1-pC1)+(1-prev)*(pT2-pC2)))^2/
  (2*((prev*(pT1*(1-pT1)+pC1*(1-pC1)))+(
  (1-prev)*(pT2*(1-pT2)+pC2*(1-pC2)))/n)],
  {pT1, aT1, bT1}, {pC1, aC1, bC1}, {pT2, aT2, bT2}, {pC2, aC2, bC2},
  Method->"LocalAdaptive",
  PrecisionGoal->8]

g1[aC1_?NumericQ, bC1_?NumericQ, aT1_?NumericQ, bT1_?NumericQ,
  tau1_?NumericQ, n_?NumericQ, prev_?NumericQ, c1_?NumericQ] :=
NIntegrate[-((pT1-pC1)-tau1)^(2)*Boole[(pT1-pC1)<tau1]*Exp[-(c1-
  (pT1-pC1))^2/(2*((pT1*(1-pT1)+pC1*(1-pC1)))/(prev*n))],
  {pT1, aT1, bT1}, {pC1, aC1, bC1}, Method->"LocalAdaptive", PrecisionGoal->8]

h1[aC1_?NumericQ, bC1_?NumericQ, aT1_?NumericQ, bT1_?NumericQ,
  tau1_?NumericQ, n_?NumericQ, prev_?NumericQ, c1_?NumericQ] :=
NIntegrate[+((pT1-pC1)-tau1)^(2)*Boole[(pT1-pC1)>tau1]*Exp[-(c1-
  (pT1-pC1))^2/(2*((pT1*(1-pT1)+pC1*(1-pC1)))/(prev*n))],
  {pT1, aT1, bT1}, {pC1, aC1, bC1}, Method->"LocalAdaptive", PrecisionGoal->8]

f0[aC1_, bC1_, aC2_, bC2_, aT1_, bT1_, aT2_, bT2_, tau0_, n_, prev_, c0_] :=
g0[aC1, bC1, aC2, bC2, aT1, bT1, aT2, bT2, tau0, n, prev, c0] +
h0[aC1, bC1, aC2, bC2, aT1, bT1, aT2, bT2, tau0, n, prev, c0]

f1[aC1_, bC1_, aT1_, bT1_, tau1_, n_, prev_, c1_] :=
g1[aC1, bC1, aT1, bT1, tau1, n, prev, c1] + h1[aC1, bC1, aT1, bT1, tau1, n, prev, c1]

b[x_] := Round[Sign[x]*Min[Abs[x], 1], 0.0001]

opt0[aC1_?NumericQ, bC1_?NumericQ, aC2_?NumericQ,
  bC2_?NumericQ, aT1_?NumericQ, bT1_?NumericQ, aT2_?NumericQ,
  bT2_?NumericQ, tau0_?NumericQ, n_?NumericQ, prev_?NumericQ] :=
b[c0 /. FindRoot[f0[aC1, bC1, aC2, bC2, aT1, bT1, aT2, bT2, tau0, n, prev, c0],
  {c0, -1, 1, -2, 2}, PrecisionGoal->3]]

opt1[aC1_?NumericQ, bC1_?NumericQ, aT1_?NumericQ,
  bT1_?NumericQ, tau1_?NumericQ, n_?NumericQ, prev_?NumericQ] :=
b[c1 /. FindRoot[f1[aC1, bC1, aT1, bT1, tau1, n, prev, c1],
  {c1, -1, 1, -2, 2}, PrecisionGoal->3]]

```

```

opt[pC1l_, pC1h_, pC2l_, pC2h_, pT1l_, pT1h_, pT2l_, pT2h_, tau0_, tau1_, n_,
  prev_] := {opt0[pC1l, pC1h, pC2l, pC2h, pT1l, pT1h, pT2l, pT2h, tau0, n, prev],
  opt1[pC1l, pC1h, pT1l, pT1h, tau1, n, prev]}

(* some example *)

opt[0.05, 0.35, 0.2, 0.5, 0.3, 0.6, 0.2, 0.5, 0.05, 0.1, 100, 0.25]
{0.0455, -0.0826}

```
